# Supplementary material for: Identification and Validation of Plasma Metabolomic Signatures in Precancerous Gastric Lesions That Progress to Cancer
Source: PubMed Central journal article supplement — JAMA Netw Open. 2021 Jun 22;4(6):e2114186. doi: 10.1001/jamanetworkopen.2021.14186 (PMC8220475; doi:10.1001/jamanetworkopen.2021.14186), 2021-06-22
Supplement: jamanetwopen-e2114186-s001.pdf [file jamanetwopen-e2114186-s001.pdf]

## Supplementary Online Content

Huang S, Guo Y, Li Z-W, et al. Identification and validation of plasma metabolomic signatures in precancerous gastric lesions that progress to cancer. *JAMA Netw Open*. 2021;4(6):e2114186.  
doi:10.1001/jamanetworkopen.2021.14186

**eMethods.** Detailed Methods

**eFigure 1.** Quality Control During LC-MS Analysis

**eFigure 2.** Metabolomic Profiles for Precancerous Gastric Lesions and GC

**eFigure 3.** Metabolite Set Enrichment Analysis for the Enriched Metabolite Pathways Associated With GC

**eFigure 4.** Metabolite Scores Associated With the Progression of Gastric Lesions During the Follow-up

**eTable 1.** Characteristics of Study Subjects in the Discovery and Validation Sets

**eTable 2.** Plasma Metabolites Associated With Advanced Gastric Lesions and Gastric Cancer

**eTable 3.** Metabolite Set Enrichment Analysis for Plasma Metabolites Associated With Gastric Cancer

This supplementary material has been provided by the authors to give readers additional information about their work.

## **eMethods. Detailed Methods**

### **Sample preparation for metabolomics**

Plasma samples were processed following previously reported method with some modifications. Briefly, 50  $\mu\text{L}$  of plasma sample were mixed with 200  $\mu\text{L}$  of ice-cold methanol and then the mixture was incubated for 30 min at 1500 rpm (4°C). The samples were further centrifuged for 10 min at 12,000 rpm (4°C) for protein precipitation. The supernatants were transferred to clean centrifuge tubes and evaporated using SpeedVac. Finally, the dried extracts were redissolved with 1% acetonitrile in water, and upper layer liquids were collected for metabolomic profiling.

### **Metabolomic profiling**

Plasma metabolomic profiling was conducted using ultra high-performance liquid chromatography-mass spectrometry (LC-MS). Chromatographic separation was performed on ACQUITY UPLC HSS T3 columns (2.1  $\times$  100 mm, 1.8  $\mu\text{m}$ , Waters, Dublin, Ireland). Ultra-performance Liquid Chromatography (Agilent 1290 II, Agilent Technologies, Germany) coupled to Quadrupole-TOF MS (5600 Triple TOF Plus, AB Sciex, Singapore) was applied to acquire metabolome data. The electrospray ionization (ESI) source was set up in positive and negative ion modes, respectively. Mobile phase A was water containing 0.1% formic acid (v/v), and mobile phase B was acetonitrile containing 0.1% formic acid (v/v). The linear gradients were as follows: 1% B at 1 min, 40% B at 5 min, 50% B at 8 min, 65% B at 10 min, 70% B at 12 min, 100%B at 12.1. The temperature of the column was maintained at 40 °C, and

autosampler was set at 4 °C. The injected volume was 5 µL per run, and the flow rate was 0.35 mL/min.

The MS parameters for detection were: ESI, source voltage 5.5 kV or -4.5 kV; vaporizer temperature, 500 °C; drying gas (N<sub>2</sub>) pressure, 50 psi; nebulizer gas (N<sub>2</sub>) pressure, 50 psi; curtain gas (N<sub>2</sub>) pressure, 35 psi; The scan range was *m/z* 60-600. Information-dependent acquisition mode was used for MS/MS analyses of the metabolites. The collision energy was set at 35 ± 15 eV.

All detected ions were extracted using MarkerView 1.3 (AB Sciex, Concord, ON, Canada) into Excel in the format of two-dimensional matrix, including mass to charge ratio (*m/z*), retention time, and peak areas, and isotopic peaks were filtered. PeakView 2.2 (AB Sciex, Concord, ON, Canada) was applied to extract MS/MS data.

Metabolites were identified by comparing their product ion spectra with standard references and open-source database, including HMDB (<http://www.hmdb.ca/>) and METLIN (<https://metlin.scripps.edu/>).

### **Quality control**

Quality control (QC) samples were prepared using mixed plasma samples. At the beginning of each batch for LC-MS analysis, four consecutive QC samples were detected to balance analytical system, and then one QC sample was inserted at a regular interval of every ten injections. Ionization signals were monitored in QC samples based on the peak intensities of internal standards to ensure no drop-in intensity (within 20%) and no drift in retention time (within 0.05 min) throughout the run. In the present study, a total of 23 QC samples were included for all batches.

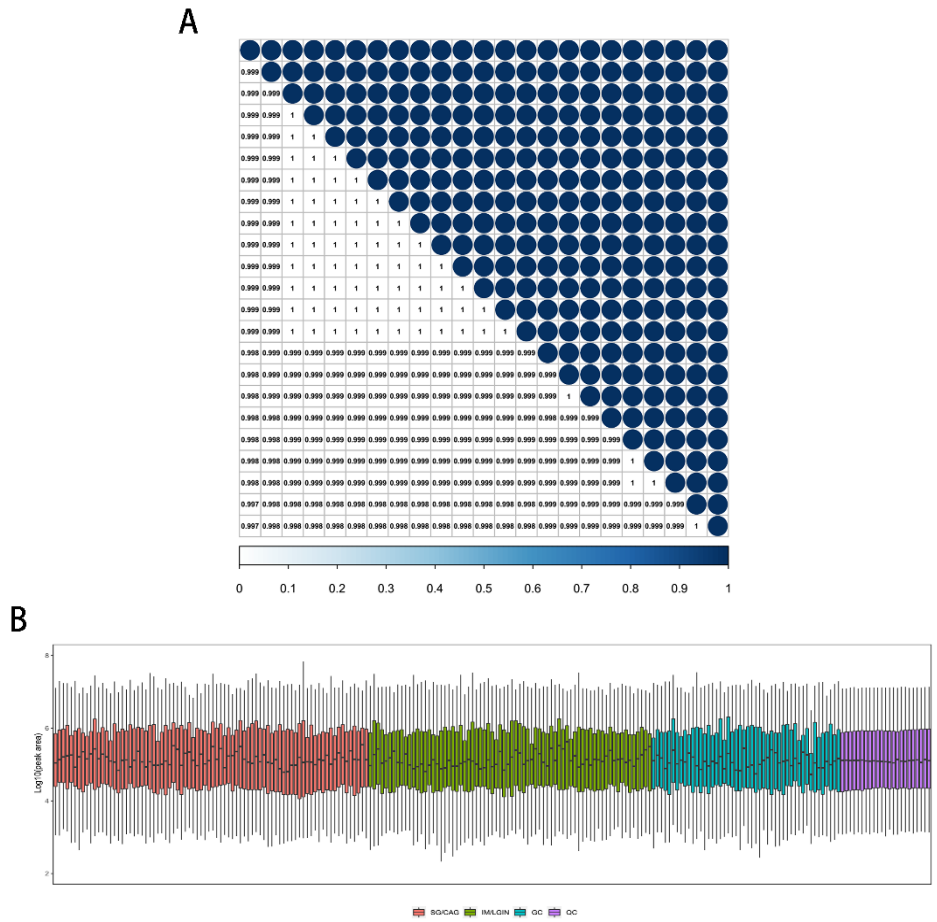

**Figure 1. Quality control during LC-MS analysis**

(A) Spearman's correlation coefficients of 23 QC runs;

(B) Intensity distribution of metabolites for all study samples and QC runs.

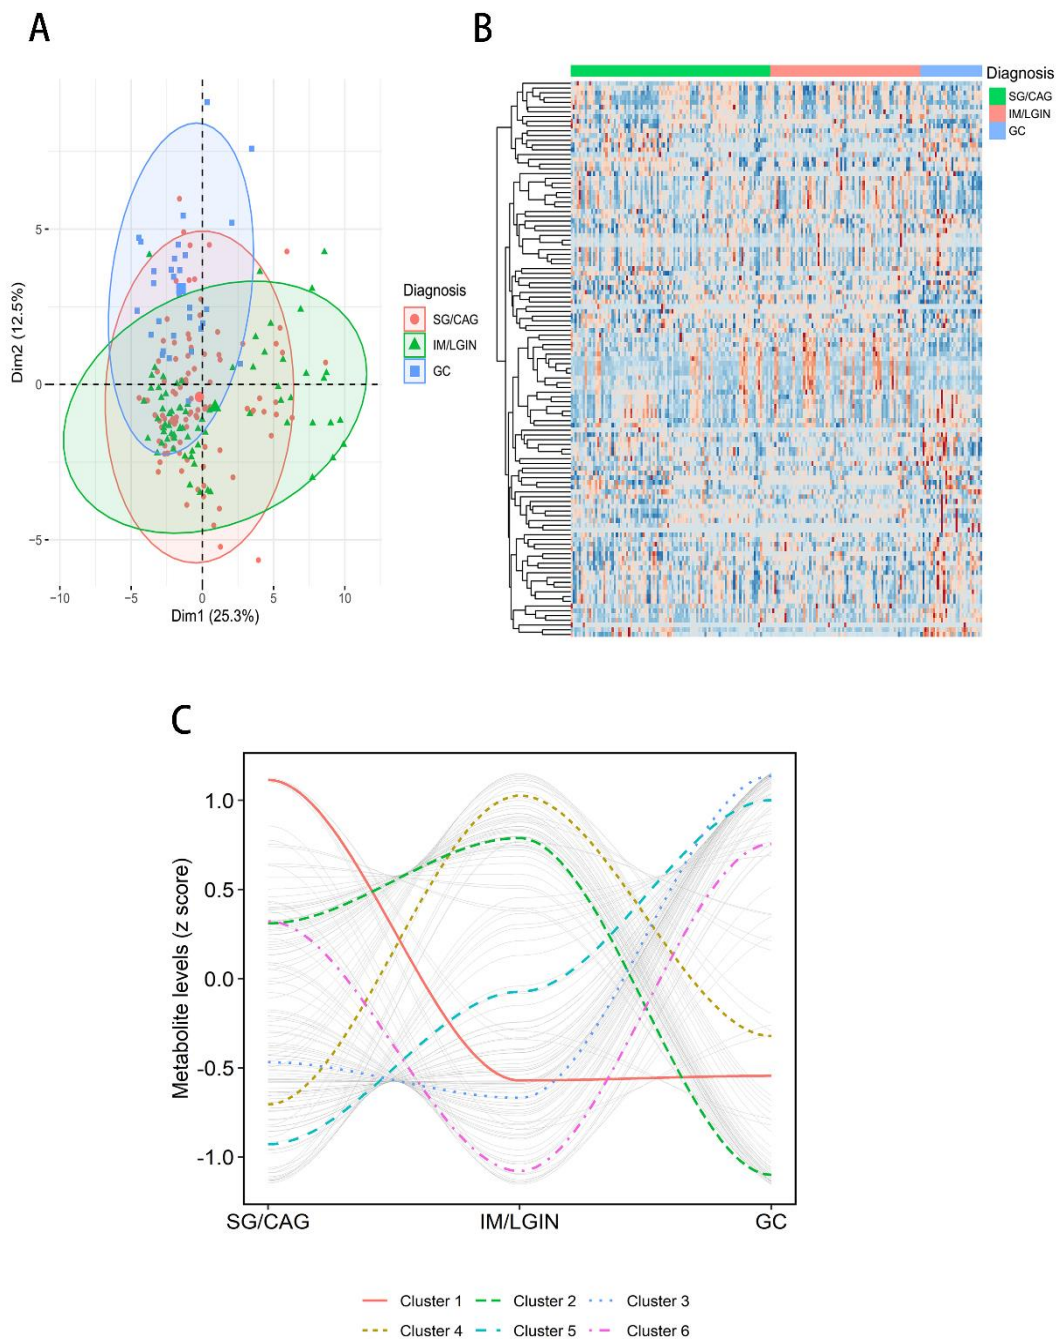

**Figure 2. Metabolomic profiles for precancerous gastric lesions and GC**

(A) Score plot of PCA for metabolomic profiles in subjects with different gastric lesions and GC;

(B) Hierarchical clustering of metabolomic profiles in subjects with different gastric lesions and GC;

(C) Trajectories of metabolites from mild gastric lesions (SG or CAG) to advanced gastric lesions (IM or LGIN) and GC and the six identified clusters grouped by similar trajectories.

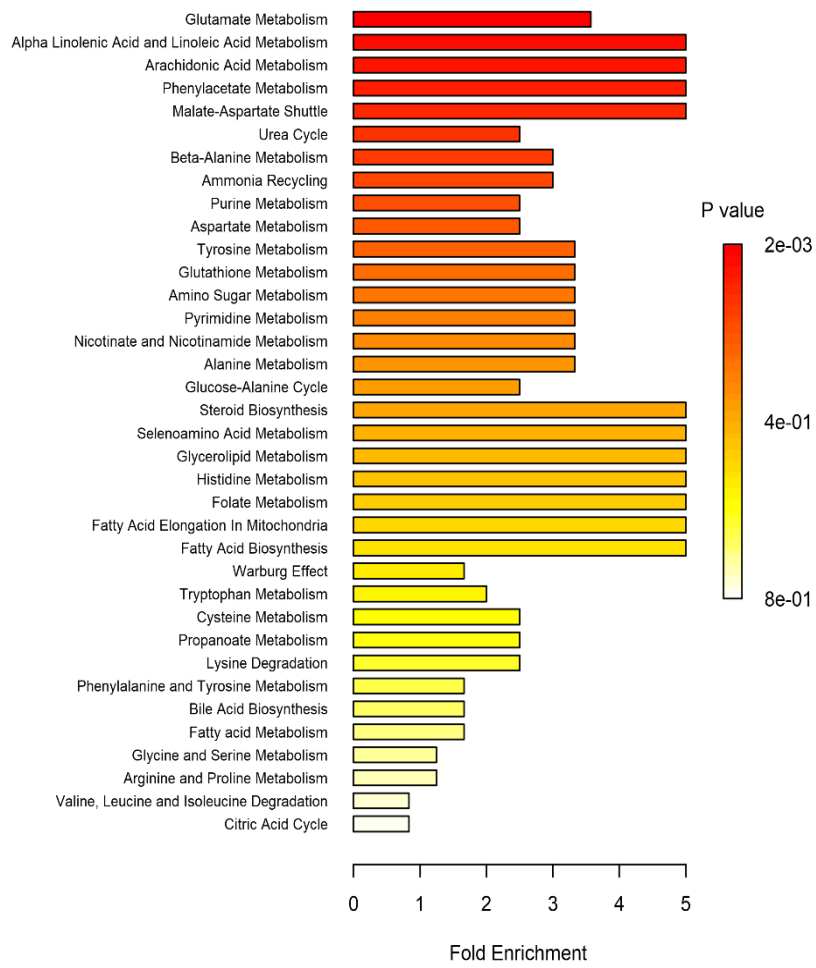

**eFigure 3. Metabolite set enrichment analysis for the enriched metabolite pathways associated with GC.**

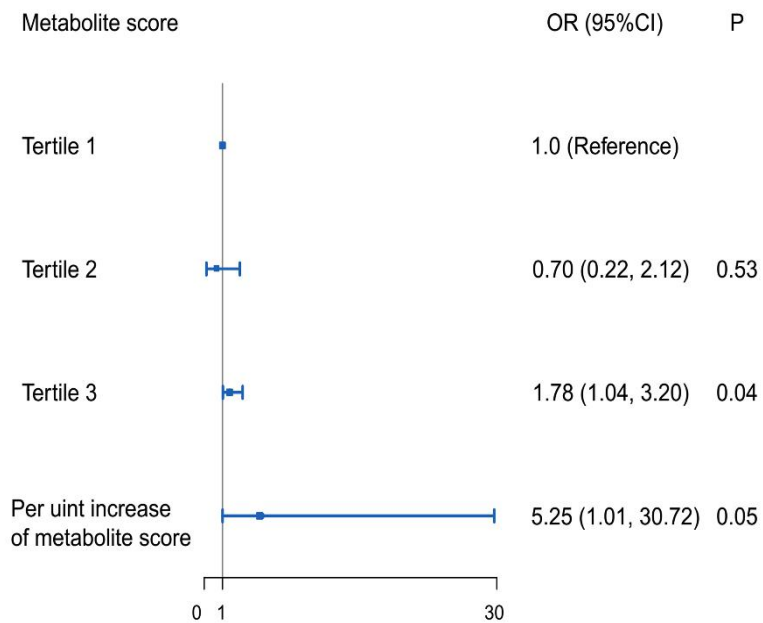

**eFigure 4. Metabolite scores associated with the progression of gastric lesions during the follow-up.**

The score was calculated based on three validated metabolites (alpha-linolenic acid, linoleic acid, and palmitic acid). Analyses were conducted by conditional logistic regression stratified on baseline gastric histopathology, with adjustment for age, sex, and *H.pylori* infection.

**eTable 1. Characteristics of study subjects in the discovery and validation sets**

| Characteristics                      | Discovery set |            |            |            | Validation set |            |            |            |
|--------------------------------------|---------------|------------|------------|------------|----------------|------------|------------|------------|
|                                      | Total         | SG/CAG     | IM/LGIN    | GC         | Total          | SG/CAG     | IM/LGIN    | GC         |
|                                      | (n = 200)     | (n = 97)   | (n = 73)   | (n = 30)   | (n = 200)      | (n = 80)   | (n = 72)   | (n = 48)   |
| <b>Age (Mean ± SD)</b>               | 56.8 ± 7.5    | 56.9 ± 7.4 | 55.7 ± 7.6 | 58.9 ± 7.6 | 57.5 ± 8.1     | 56.1 ± 8.5 | 57.2 ± 8.1 | 60.2 ± 6.8 |
| <b>Sex (%)</b>                       |               |            |            |            |                |            |            |            |
| Male                                 | 124 (62.0)    | 58 (59.8)  | 39 (53.4)  | 27 (90.0)  | 136 (68.0)     | 42 (52.5)  | 53 (73.6)  | 41 (85.4)  |
| Female                               | 76 (38.0)     | 39 (40.2)  | 34 (46.6)  | 3 (10.0)   | 64 (32.0)      | 38 (47.5)  | 19 (26.4)  | 7 (14.6)   |
| <b><i>H.pylori</i> infection (%)</b> |               |            |            |            |                |            |            |            |
| Yes                                  | 98 (49.0)     | 43 (44.3)  | 43 (58.9)  | 12 (40.0)  | 107 (53.5)     | 40 (50.0)  | 39 (54.2)  | 28 (58.3)  |
| No                                   | 102 (51.0)    | 54 (55.7)  | 30 (41.1)  | 18 (60.0)  | 93 (46.5)      | 40 (50.0)  | 33 (45.8)  | 20 (41.7)  |

CAG, chronic atrophic gastritis; LGIN, low-grade intraepithelial neoplasia; GC, gastric cancer; *H.pylori*, *Helicobacter pylori*; IM, intestinal metaplasia; SG, superficial gastritis



**eTable 2. Plasma metabolites associated with advanced gastric lesions and gastric cancer<sup>a</sup>**

| Metabolites                      | Discovery set      |                   |     |     |               |                   |       |             |                                  |                   |       |            | Validation set     |                   |      |               |                   |             |                                  |                   |            |
|----------------------------------|--------------------|-------------------|-----|-----|---------------|-------------------|-------|-------------|----------------------------------|-------------------|-------|------------|--------------------|-------------------|------|---------------|-------------------|-------------|----------------------------------|-------------------|------------|
|                                  | IM/LGIN vs. SG/CAG |                   |     |     | GC vs. SG/CAG |                   |       |             | Early GC <sup>b</sup> vs. SG/CAG |                   |       |            | IM/LGIN vs. SG/CAG |                   |      | GC vs. SG/CAG |                   |             | Early GC <sup>b</sup> vs. SG/CAG |                   |            |
|                                  | n/n                | OR (95%CI)        | P   | FDR | n/n           | OR (95%CI)        | P     | FDR         | n/n                              | OR (95%CI)        | P     | FDR        | n/n                | OR (95%CI)        | P    | n/n           | OR (95%CI)        | P           | n/n                              | OR (95%CI)        | P          |
| L-Aspartic acid                  | 73/97              | 0.60 (0.39, 0.92) | .02 | .29 | 30/97         | 2.68 (1.72, 4.37) | <.001 | <b>.003</b> | 22/97                            | 2.43 (1.51, 4.10) | <.001 | <b>.01</b> | 72/80              | 0.84 (0.69, 2.12) | .17  | 48/80         | 0.68 (0.49, 0.96) | <b>.03</b>  | 31/80                            | 0.87 (0.59, 1.27) | .27        |
| sn-2 LysoPC(20:3)                | 73/97              | 1.31 (0.93, 1.87) | .12 | .41 | 30/97         | 0.29 (0.14, 0.51) | <.001 | <b>.003</b> | 22/97                            | 0.21 (0.08, 0.43) | <.001 | <b>.01</b> | 72/80              | 0.58 (1.19, 1.21) | .001 | 48/80         | 0.65 (0.45, 0.94) | <b>.03</b>  | 31/80                            | 0.78 (0.53, 1.16) | .15        |
| sn-1 LysoPC(18:3)                | 73/97              | 1.26 (0.90, 1.77) | .18 | .47 | 30/97         | 0.27 (0.13, 0.50) | <.001 | <b>.003</b> | 22/97                            | 0.26 (0.11, 0.51) | <.001 | <b>.01</b> | 72/80              | 0.68 (1.14, 1.26) | .02  | 48/80         | 0.62 (0.43, 0.88) | <b>.01</b>  | 31/80                            | 0.76 (0.51, 1.11) | .12        |
| p-Cresol sulfate                 | 73/97              | 1.36 (0.99, 1.89) | .06 | .41 | 30/97         | 3.56 (1.92, 7.49) | <.001 | <b>.005</b> | 22/97                            | 3.32 (1.69, 7.50) | .001  | <b>.02</b> | 72/80              | 1.02 (0.27, 5.27) | .45  | 48/80         | 0.74 (0.53, 1.04) | .07         | 31/80                            | 0.69 (0.47, 1.01) | .05        |
| Uracil                           | 73/97              | 0.81 (0.54, 1.21) | .31 | .60 | 30/97         | 0.42 (0.25, 0.64) | <.001 | <b>.005</b> | 22/97                            | 0.34 (0.19, 0.57) | <.001 | <b>.01</b> | 72/80              | 1.09 (0.44, 3.24) | .30  | 48/80         | 0.80 (0.58, 1.10) | .12         | 31/80                            | 1.12 (0.77, 1.64) | .30        |
| Alpha-N-Phenylacetyl-L-glutamine | 73/97              | 1.37 (0.97, 1.95) | .07 | .41 | 30/97         | 2.77 (1.64, 5.01) | <.001 | <b>.005</b> | 22/97                            | 2.48 (1.43, 4.63) | .002  | <b>.02</b> | 72/80              | 0.87 (0.56, 2.60) | .23  | 48/80         | 0.91 (0.65, 1.27) | .32         | 31/80                            | 0.79 (0.54, 1.16) | .16        |
| Alpha-Linolenic acid             | 73/97              | 1.09 (0.78, 1.53) | .62 | .84 | 30/97         | 0.37 (0.21, 0.62) | <.001 | <b>.006</b> | 22/97                            | 0.30 (0.14, 0.55) | <.001 | <b>.01</b> | 72/80              | 0.81 (0.80, 1.84) | .13  | 48/80         | 0.53 (0.36, 0.78) | <b>.003</b> | 31/80                            | 0.62 (0.41, 0.92) | <b>.02</b> |
| sn-2 LysoPC(18:1)                | 73/97              | 1.30 (0.95, 1.81) | .10 | .41 | 30/97         | 0.26 (0.12, 0.52) | <.001 | <b>.006</b> | 22/97                            | 0.24 (0.10, 0.54) | .001  | <b>.02</b> | 72/80              | 0.66 (1.16, 1.23) | .01  | 48/80         | 0.76 (0.55, 1.07) | .09         | 31/80                            | 0.90 (0.62, 1.31) | .32        |

|                     |       |                   |     |     |       |                   |      |            |       |                   |      |            |  |       |                   |     |       |                   |             |       |                   |            |
|---------------------|-------|-------------------|-----|-----|-------|-------------------|------|------------|-------|-------------------|------|------------|--|-------|-------------------|-----|-------|-------------------|-------------|-------|-------------------|------------|
| Indoxyl sulfate     | 73/97 | 1.28 (0.93, 1.79) | .13 | .41 | 30/97 | 2.42 (1.47, 4.31) | .001 | <b>.01</b> | 22/97 | 2.66 (1.51, 5.19) | .002 | <b>.02</b> |  | 72/80 | 0.95 (0.35, 4.08) | .37 | 48/80 | 0.87 (0.63, 1.20) | .23         | 31/80 | 0.88 (0.61, 1.28) | .29        |
| Phenylalanyl-Serine | 73/97 | 1.55 (1.04, 2.45) | .04 | .37 | 30/97 | 0.44 (0.25, 0.70) | .001 | <b>.01</b> | 22/97 | 0.44 (0.24, 0.74) | .004 | <b>.03</b> |  | 72/80 | 1.21 (0.71, 2.10) | .17 | 48/80 | 2.02 (1.39, 2.93) | <b>.001</b> | 31/80 | 1.76 (1.18, 2.64) | <b>.01</b> |
| Linoleic acid       | 73/97 | 1.12 (0.80, 1.56) | .51 | .76 | 30/97 | 0.43 (0.24, 0.72) | .002 | <b>.02</b> | 22/97 | 0.32 (0.15, 0.60) | .001 | <b>.02</b> |  | 72/80 | 0.80 (0.82, 1.74) | .11 | 48/80 | 0.56 (0.38, 0.81) | <b>.01</b>  | 31/80 | 0.63 (0.42, 0.96) | <b>.04</b> |
| L-Alanine           | 73/97 | 0.65 (0.42, 0.98) | .04 | .37 | 30/97 | 1.87 (1.26, 2.88) | .003 | <b>.02</b> | 22/97 | 1.75 (1.15, 2.78) | .01  | .07        |  | 72/80 | 1.17 (0.63, 2.28) | .19 | 48/80 | 0.93 (0.65, 1.34) | .38         | 31/80 | 1.31 (0.86, 2.00) | .14        |
| N-Acetylglutamine   | 73/97 | 0.83 (0.52, 1.26) | .39 | .66 | 30/97 | 1.71 (1.19, 2.52) | .005 | <b>.03</b> | 22/97 | 1.90 (1.27, 2.94) | .003 | <b>.02</b> |  | 72/80 | 0.84 (0.68, 2.12) | .17 | 48/80 | 0.92 (0.66, 1.27) | .33         | 31/80 | 0.92 (0.64, 1.33) | .35        |
| Palmitic acid       | 73/97 | 1.23 (0.89, 1.71) | .22 | .51 | 30/97 | 0.47 (0.26, 0.79) | .007 | <b>.04</b> | 22/97 | 0.32 (0.15, 0.62) | .002 | <b>.02</b> |  | 72/80 | 0.70 (1.11, 1.30) | .02 | 48/80 | 0.56 (0.38, 0.82) | <b>.01</b>  | 31/80 | 0.67 (0.44, 1.03) | <b>.04</b> |
| sn-2 LysoPC(20:2)   | 73/97 | 1.34 (0.98, 1.85) | .07 | .41 | 30/97 | 0.39 (0.19, 0.74) | .007 | <b>.04</b> | 22/97 | 0.37 (0.16, 0.76) | .01  | .07        |  | 72/80 | 0.72 (1.09, 1.28) | .03 | 48/80 | 0.72 (0.50, 1.04) | .07         | 31/80 | 0.80 (0.53, 1.21) | .19        |
| L-Glutamine         | 73/97 | 0.80 (0.58, 1.11) | .19 | .47 | 30/97 | 0.52 (0.31, 0.81) | .008 | <b>.04</b> | 22/97 | 0.60 (0.35, 0.98) | .05  | .19        |  | 72/80 | 0.80 (0.82, 1.81) | .12 | 48/80 | 0.79 (0.58, 1.08) | .11         | 31/80 | 0.69 (0.49, 0.96) | <b>.03</b> |
| Isocitric acid      | 73/97 | 1.20 (0.85, 1.71) | .30 | .59 | 30/97 | 1.96 (1.23, 3.33) | .008 | <b>.04</b> | 22/97 | 1.98 (1.18, 3.60) | .01  | .07        |  | 72/80 | 1.21 (0.64, 2.47) | .20 | 48/80 | 0.92 (0.68, 1.24) | .32         | 31/80 | 0.89 (0.63, 1.24) | .28        |
| Arachidonic acid    | 73/97 | 1.35 (0.98, 1.88) | .07 | .41 | 30/97 | 0.51 (0.28, 0.85) | .01  | <b>.05</b> | 22/97 | 0.42 (0.20, 0.78) | .01  | .07        |  | 72/80 | 0.88 (0.58, 2.44) | .22 | 48/80 | 0.70 (0.50, 0.99) | <b>.05</b>  | 31/80 | 0.83 (0.57, 1.21) | .21        |

<sup>a</sup> Individual metabolites associated with GC in the discovery stage (FDR<0.05) and validation stage ( $P<0.05$ ) are shown here. Logistic regression analyses were conducted adjusting for age, sex, and *H.pylori* infection. Metabolites were ranked by the  $P$  values for GC in the discovery set. Four metabolites significantly associated with GC in the discovery set (FDR<0.05), including L-palmitoylcarnitine, stearyl carnitine, sn-2 LysoPC(20:5) and sn-2 LysoPC(22:5), were found below the detection limit in the validation set, leaving the remaining 18 metabolites for analysis.

<sup>b</sup> We defined subjects with HGIN as early GC cases here.

CAG, chronic atrophic gastritis; GC, gastric cancer; IM, intestinal metaplasia; LGIN, low-grade intraepithelial neoplasia; OR, odds ratio; SG, superficial gastritis

**eTable 3. Metabolite set enrichment analysis for plasma metabolites associated with gastric cancer**

| Metabolite Set                                    | <i>P</i>    | Fold enrichment | Metabolite                                                                                                     |
|---------------------------------------------------|-------------|-----------------|----------------------------------------------------------------------------------------------------------------|
| Glutamate Metabolism                              | <b>.002</b> | 3.57            | Gamma-Aminobutyric acid, L-Glutamic acid, L-Alanine, L-Aspartic acid, Pyruvic acid, Succinic acid, L-Glutamine |
| Alpha Linolenic Acid and Linoleic Acid Metabolism | <b>.006</b> | 5.00            | Linoleic acid, Arachidonic acid, Alpha-Linolenic acid                                                          |
| Arachidonic Acid Metabolism                       | <b>.04</b>  | 5.00            | L-Glutamic acid, Arachidonic acid                                                                              |
| Phenylacetate Metabolism                          | <b>.04</b>  | 5.00            | L-Glutamine, Alpha-N-Phenylacetyl-L-glutamine                                                                  |
| Malate-Aspartate Shuttle                          | <b>.04</b>  | 5.00            | L-Glutamic acid, L-Aspartic acid                                                                               |
| Urea Cycle                                        | <b>.04</b>  | 2.50            | L-Glutamic acid, L-Alanine, L-Aspartic acid, Pyruvic acid, Urea, L-Arginine, L-Glutamine, Citrulline           |
| Beta-Alanine Metabolism                           | <b>.05</b>  | 3.00            | Dihydrouracil, L-Glutamic acid, L-Aspartic acid, Pantothenic acid, Uracil                                      |
| Ammonia Recycling                                 | <b>.05</b>  | 3.00            | L-Glutamic acid, L-Asparagine, L-Aspartic acid, Pyruvic acid, L-Glutamine                                      |
| Purine Metabolism                                 | .09         | 2.50            | L-Glutamic acid, Hypoxanthine, L-Aspartic acid, Uric acid, Xanthine, L-Glutamine                               |
| Aspartate Metabolism                              | .09         | 2.50            | L-Glutamic acid, L-Asparagine, L-Aspartic acid, L-Arginine, L-Glutamine, Citrulline                            |
| Tyrosine Metabolism                               | .10         | 3.33            | L-Glutamic acid, L-Tyrosine, L-Aspartic acid                                                                   |
| Glutathione Metabolism                            | .10         | 3.33            | L-Glutamic acid, L-Alanine, Pyroglutamic acid                                                                  |
| Amino Sugar Metabolism                            | .10         | 3.33            | L-Glutamic acid, Pyruvic acid, L-Glutamine                                                                     |
| Pyrimidine Metabolism                             | .10         | 3.33            | Dihydrouracil, Uracil, L-Glutamine                                                                             |
| Nicotinate and Nicotinamide Metabolism            | .10         | 3.33            | L-Glutamic acid, L-Glutamine, N1-Methyl-2-pyridone-5-carboxamide                                               |
| Alanine Metabolism                                | .10         | 3.33            | L-Glutamic acid, L-Alanine, Pyruvic acid                                                                       |

|                                            |     |      |                                                                                                                                |
|--------------------------------------------|-----|------|--------------------------------------------------------------------------------------------------------------------------------|
| Glucose-Alanine Cycle                      | .18 | 2.50 | D-Glucose, L-Glutamic acid, L-Alanine, Pyruvic acid                                                                            |
| Steroid Biosynthesis                       | .20 | 5.00 | Palmitic acid                                                                                                                  |
| Selenoamino Acid Metabolism                | .20 | 5.00 | L-Alanine                                                                                                                      |
| Glycerolipid Metabolism                    | .20 | 5.00 | Palmitic acid                                                                                                                  |
| Histidine Metabolism                       | .20 | 5.00 | L-Glutamic acid                                                                                                                |
| Folate Metabolism                          | .20 | 5.00 | L-Glutamic acid                                                                                                                |
| Fatty Acid Elongation In Mitochondria      | .20 | 5.00 | Palmitic acid                                                                                                                  |
| Fatty Acid Biosynthesis                    | .20 | 5.00 | Palmitic acid                                                                                                                  |
| Warburg Effect                             | .25 | 1.67 | Citric acid, D-Glucose, L-Glutamic acid, L-Malic acid, L-Lactic acid, Isocitric acid, Pyruvic acid, Succinic acid, L-Glutamine |
| Tryptophan Metabolism                      | .26 | 2.00 | L-Glutamic acid, L-Alanine, 5-Hydroxy-L-tryptophan, L-Kynurenine, L-Tryptophan                                                 |
| Cysteine Metabolism                        | .36 | 2.50 | L-Glutamic acid, Pyruvic acid                                                                                                  |
| Propanoate Metabolism                      | .36 | 2.50 | L-Glutamic acid, L-Valine                                                                                                      |
| Lysine Degradation                         | .36 | 2.50 | L-Glutamic acid, L-Lysine                                                                                                      |
| Phenylalanine and Tyrosine Metabolism      | .50 | 1.67 | L-Glutamic acid, L-Tyrosine, L-Phenylalanine                                                                                   |
| Bile Acid Biosynthesis                     | .50 | 1.67 | Glycocholic acid, Palmitic acid, Taurine                                                                                       |
| Fatty acid Metabolism                      | .50 | 1.67 | L-Carnitine, Palmitic acid, L-Palmitoylcarnitine                                                                               |
| Glycine and Serine Metabolism              | .51 | 1.25 | Betaine, Creatine, L-Glutamic acid, L-Alanine, L-Threonine, Pyruvic acid, L-Arginine, L-Methionine                             |
| Arginine and Proline Metabolism            | .51 | 1.25 | Creatine, L-Glutamic acid, L-Proline, L-Aspartic acid, Succinic acid, Urea, L-Arginine, Citrulline                             |
| Valine, Leucine and Isoleucine Degradation | .76 | 0.83 | Alpha-ketoisovaleric acid, L-Glutamic acid, L-Isoleucine, Succinic acid, L-Leucine, L-Valine                                   |

|                   |     |      |                                                                                           |
|-------------------|-----|------|-------------------------------------------------------------------------------------------|
| Citric Acid Cycle | .76 | 0.83 | cis-Aconitic acid, Citric acid, L-Malic acid, Isocitric acid, Pyruvic acid, Succinic acid |
|-------------------|-----|------|-------------------------------------------------------------------------------------------|

*P* values of over-representation analysis were calculated using hypergeometric test; Fold enrichment was calculated by dividing the observed number of significant metabolites by the expected number of significant metabolites for each pathway.
